# Supplementary material for: Ligand Triplet Energy Escape in Lanthanide Complexes for Developing Luminescent Molecular Thermometers
Source: Research Square preprint supplement (doi:10.21203/rs.3.rs-6678504/v1), 2025-06-02

## checkCIF/PLATON report

Structure factors have been supplied for datablock(s) tbdptp\_2

THIS REPORT IS FOR GUIDANCE ONLY. IF USED AS PART OF A REVIEW PROCEDURE FOR PUBLICATION, IT SHOULD NOT REPLACE THE EXPERTISE OF AN EXPERIENCED CRYSTALLOGRAPHIC REFEREE.

No syntax errors found.      CIF dictionary      Interpreting this report

### Datablock: tbdptp\_2

---

|                        |                                        |                           |                           |
|------------------------|----------------------------------------|---------------------------|---------------------------|
| Bond precision:        | C-C = 0.0095 A                         | Wavelength=0.71073        |                           |
| Cell:                  | a=40.9140 (15)<br>alpha=90             | b=31.3064 (15)<br>beta=90 | c=18.6551 (5)<br>gamma=90 |
| Temperature:           | 293 K                                  |                           |                           |
|                        | Calculated                             | Reported                  |                           |
| Volume                 | 23894.8 (16)                           | 23894.8 (16)              |                           |
| Space group            | P c c n                                | P c c n                   |                           |
| Hall group             | -P 2ab 2ac                             | -P 2ab 2ac                |                           |
| Moiety formula         | C114 H66 F36 O16 P4 Tb2 [+<br>solvent] | C114 H66 F36 O16 P4 Tb2   |                           |
| Sum formula            | C114 H66 F36 O16 P4 Tb2 [+<br>solvent] | C114 H66 F36 O16 P4 Tb2   |                           |
| Mr                     | 2817.41                                | 2817.38                   |                           |
| Dx, g cm <sup>-3</sup> | 1.566                                  | 1.566                     |                           |
| Z                      | 8                                      | 8                         |                           |
| Mu (mm <sup>-1</sup> ) | 1.345                                  | 1.345                     |                           |
| F000                   | 11136.0                                | 11136.0                   |                           |
| F000'                  | 11144.52                               |                           |                           |
| h, k, lmax             | 59, 45, 26                             | 58, 38, 25                |                           |
| Nref                   | 37926                                  | 29699                     |                           |
| Tmin, Tmax             | 0.845, 0.914                           | 0.427, 1.000              |                           |
| Tmin'                  | 0.845                                  |                           |                           |

Correction method= # Reported T Limits: Tmin=0.427 Tmax=1.000  
AbsCorr = MULTI-SCAN

Data completeness= 0.783      Theta (max)= 30.949

R(reflections)= 0.0667( 20378)

wR2(reflections)=  
0.1508( 29699)

S = 1.024

Npar= 1549

---

The following ALERTS were generated. Each ALERT has the format

**test-name\_ALERT\_alert-type\_alert-level.**

Click on the hyperlinks for more details of the test.

---

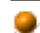

### Alert level B

|                                                          |                             |            |
|----------------------------------------------------------|-----------------------------|------------|
| PLAT213_ALERT_2_B Atom F03S                              | has ADP max/min Ratio ..... | 4.1 prolat |
| PLAT213_ALERT_2_B Atom F044                              | has ADP max/min Ratio ..... | 4.1 prolat |
| PLAT213_ALERT_2_B Atom F04I                              | has ADP max/min Ratio ..... | 4.2 prolat |
| PLAT213_ALERT_2_B Atom F04L                              | has ADP max/min Ratio ..... | 5.0 prolat |
| PLAT213_ALERT_2_B Atom F04S                              | has ADP max/min Ratio ..... | 4.4 prolat |
| PLAT230_ALERT_2_B Hirshfeld Test Diff for F04I --C04U    | .                           | 7.8 s.u.   |
| PLAT331_ALERT_2_B Small Aver Phenyl C-C Dist C01T --C04P | .                           | 1.36 Ang.  |

---

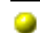

### Alert level C

|                                                                   |                             |             |
|-------------------------------------------------------------------|-----------------------------|-------------|
| PLAT213_ALERT_2_C Atom F01L                                       | has ADP max/min Ratio ..... | 3.6 prolat  |
| PLAT213_ALERT_2_C Atom F02K                                       | has ADP max/min Ratio ..... | 3.2 prolat  |
| PLAT213_ALERT_2_C Atom F02S                                       | has ADP max/min Ratio ..... | 3.8 prolat  |
| PLAT213_ALERT_2_C Atom F035                                       | has ADP max/min Ratio ..... | 3.6 prolat  |
| PLAT213_ALERT_2_C Atom F036                                       | has ADP max/min Ratio ..... | 3.2 prolat  |
| PLAT213_ALERT_2_C Atom F037                                       | has ADP max/min Ratio ..... | 3.9 prolat  |
| PLAT213_ALERT_2_C Atom F03B                                       | has ADP max/min Ratio ..... | 3.2 prolat  |
| PLAT213_ALERT_2_C Atom F03F                                       | has ADP max/min Ratio ..... | 3.5 prolat  |
| PLAT213_ALERT_2_C Atom F03U                                       | has ADP max/min Ratio ..... | 3.3 prolat  |
| PLAT213_ALERT_2_C Atom F04N                                       | has ADP max/min Ratio ..... | 3.1 prolat  |
| PLAT213_ALERT_2_C Atom F04Q                                       | has ADP max/min Ratio ..... | 3.2 prolat  |
| PLAT220_ALERT_2_C NonSolvent Resd 1 C Ueq(max)/Ueq(min) Range     |                             | 4.6 Ratio   |
| PLAT220_ALERT_2_C NonSolvent Resd 1 F Ueq(max)/Ueq(min) Range     |                             | 5.3 Ratio   |
| PLAT222_ALERT_3_C NonSolvent Resd 1 H Uiso(max)/Uiso(min) Range   |                             | 4.5 Ratio   |
| PLAT234_ALERT_4_C Large Hirshfeld Difference F00X --C04E          | .                           | 0.16 Ang.   |
| PLAT234_ALERT_4_C Large Hirshfeld Difference F02V --C04H          | .                           | 0.18 Ang.   |
| PLAT234_ALERT_4_C Large Hirshfeld Difference F04N --C04U          | .                           | 0.18 Ang.   |
| PLAT234_ALERT_4_C Large Hirshfeld Difference F04S --C04E          | .                           | 0.17 Ang.   |
| PLAT241_ALERT_2_C High 'MainMol' Ueq as Compared to Neighbors of  | C03L                        | Check       |
| PLAT241_ALERT_2_C High 'MainMol' Ueq as Compared to Neighbors of  | C047                        | Check       |
| PLAT241_ALERT_2_C High 'MainMol' Ueq as Compared to Neighbors of  | C04G                        | Check       |
| PLAT241_ALERT_2_C High 'MainMol' Ueq as Compared to Neighbors of  | C04P                        | Check       |
| PLAT241_ALERT_2_C High 'MainMol' Ueq as Compared to Neighbors of  | C04R                        | Check       |
| PLAT241_ALERT_2_C High 'MainMol' Ueq as Compared to Neighbors of  | C04T                        | Check       |
| PLAT242_ALERT_2_C Low 'MainMol' Ueq as Compared to Neighbors of   | C01T                        | Check       |
| PLAT242_ALERT_2_C Low 'MainMol' Ueq as Compared to Neighbors of   | C02N                        | Check       |
| PLAT242_ALERT_2_C Low 'MainMol' Ueq as Compared to Neighbors of   | C02U                        | Check       |
| PLAT242_ALERT_2_C Low 'MainMol' Ueq as Compared to Neighbors of   | C03D                        | Check       |
| PLAT242_ALERT_2_C Low 'MainMol' Ueq as Compared to Neighbors of   | C042                        | Check       |
| PLAT242_ALERT_2_C Low 'MainMol' Ueq as Compared to Neighbors of   | C04C                        | Check       |
| PLAT331_ALERT_2_C Small Aver Phenyl C-C Dist C02N --C047          | .                           | 1.36 Ang.   |
| PLAT342_ALERT_3_C Low Bond Precision on C-C Bonds .....           |                             | 0.0095 Ang. |
| PLAT410_ALERT_2_C Short Intra H...H Contact H01S ..H02L           | .                           | 1.99 Ang.   |
|                                                                   | x,y,z =                     | 1_555 Check |
| PLAT906_ALERT_3_C Large K Value in the Analysis of Variance ..... |                             | 5.566 Check |

|                   |                                                 |       |        |
|-------------------|-------------------------------------------------|-------|--------|
| PLAT906_ALERT_3_C | Large K Value in the Analysis of Variance ..... | 2.576 | Check  |
| PLAT911_ALERT_3_C | Missing FCF Refl Between Thmin & STh/L= 0.600   | 6     | Report |
|                   | 4 1 1, 7 2 1, 0 2 2, 2 4 2, 3 1 2, 4 0 2,       |       |        |
| PLAT971_ALERT_2_C | Check Calcd Resid. Dens. 0.99Ang From Tb01      | 1.59  | eA-3   |

## Alert level G

|                   |                                                  |        |        |
|-------------------|--------------------------------------------------|--------|--------|
| PLAT003_ALERT_2_G | Number of Uiso or Uij Restrained non-H Atoms ... | 8      | Report |
| PLAT083_ALERT_2_G | SHELXL Second Parameter in WGHT Unusually Large  | 98.43  | Why ?  |
| PLAT178_ALERT_4_G | The CIF-Embedded .res File Contains SIMU Records | 2      | Report |
| PLAT187_ALERT_4_G | The CIF-Embedded .res File Contains RIGU Records | 2      | Report |
| PLAT188_ALERT_3_G | A Non-default SIMU Restraint Value has been used | 0.0200 | Report |
| PLAT188_ALERT_3_G | A Non-default SIMU Restraint Value has been used | 0.0200 | Report |
| PLAT190_ALERT_3_G | A Non-default RIGU Restraint Value for First Par | 0.0020 | Report |
| PLAT190_ALERT_3_G | A Non-default RIGU Restraint Value for SecondPar | 0.0020 | Report |
| PLAT190_ALERT_3_G | A Non-default RIGU Restraint Value for First Par | 0.0020 | Report |
| PLAT190_ALERT_3_G | A Non-default RIGU Restraint Value for SecondPar | 0.0020 | Report |
| PLAT199_ALERT_1_G | Reported _cell_measurement_temperature ..... (K) | 293    | Check  |
| PLAT200_ALERT_1_G | Reported _diffn_ambient_temperature ..... (K)    | 293    | Check  |
| PLAT242_ALERT_2_G | Low 'MainMol' Ueq as Compared to Neighbors of    | C10    | Check  |
| PLAT242_ALERT_2_G | Low 'MainMol' Ueq as Compared to Neighbors of    | C02D   | Check  |
| PLAT242_ALERT_2_G | Low 'MainMol' Ueq as Compared to Neighbors of    | C02Z   | Check  |
| PLAT242_ALERT_2_G | Low 'MainMol' Ueq as Compared to Neighbors of    | C039   | Check  |
| PLAT242_ALERT_2_G | Low 'MainMol' Ueq as Compared to Neighbors of    | C03R   | Check  |
| PLAT242_ALERT_2_G | Low 'MainMol' Ueq as Compared to Neighbors of    | C03X   | Check  |
| PLAT242_ALERT_2_G | Low 'MainMol' Ueq as Compared to Neighbors of    | C049   | Check  |
| PLAT242_ALERT_2_G | Low 'MainMol' Ueq as Compared to Neighbors of    | C04B   | Check  |
| PLAT242_ALERT_2_G | Low 'MainMol' Ueq as Compared to Neighbors of    | C04E   | Check  |
| PLAT242_ALERT_2_G | Low 'MainMol' Ueq as Compared to Neighbors of    | C04H   | Check  |
| PLAT242_ALERT_2_G | Low 'MainMol' Ueq as Compared to Neighbors of    | C04O   | Check  |
| PLAT242_ALERT_2_G | Low 'MainMol' Ueq as Compared to Neighbors of    | C04U   | Check  |
| PLAT333_ALERT_2_G | Large Aver C6-Ring C-C Dist C011 -C01N .         | 1.43   | Ang.   |
| PLAT333_ALERT_2_G | Large Aver C6-Ring C-C Dist C013 -C01K .         | 1.43   | Ang.   |
| PLAT434_ALERT_2_G | Short Inter HL..HL Contact F00I ..F00P .         | 2.81   | Ang.   |
|                   | 1-x,-1/2+y,1/2-z =                               | 3_645  | Check  |
| PLAT434_ALERT_2_G | Short Inter HL..HL Contact F01Z ..F037 .         | 2.81   | Ang.   |
|                   | 1-x,-1/2+y,1/2-z =                               | 3_645  | Check  |
| PLAT606_ALERT_4_G | Solvent Accessible VOID(S) in Structure .....    | !      | Info   |
| PLAT720_ALERT_4_G | Number of Unusual/Non-Standard Labels .....      | 237    | Note   |

|      |      |      |      |      |      |      |      |
|------|------|------|------|------|------|------|------|
| Tb01 | Tb02 | P003 | P004 | P005 | P006 | F007 | O008 |
| O009 | F00A | O00B | O00C | O00D | O00E | O00F | F00G |
| O00H | F00I | O00J | O00K | O00L | O00M | O00N | O00O |
| F00P | O00Q | O00R | F00S | F00T | F00W | F00X | F00Y |
| F00Z | F010 | C011 | F012 | C013 | C014 | C015 | C016 |
| C017 | C018 | C019 | H019 | C01A | C01B | H01B | C01C |
| F01D | C01E | C01F | H01F | C01G | C01H | H01H | C01I |
| F01J | C01K | F01L | C01M | C01N | F01O | C01P | C01Q |
| H01Q | C01R | H01R | C01S | H01S | C01T | C01U | H01U |
| C01V | H01V | C01W | H01W | C01X | H01X | C01Y | H01Y |
| F01Z | C020 | C021 | F022 | C023 | C024 | H024 | C025 |
| C026 | H026 | C027 | C028 | H028 | C029 | H029 | C02A |
| C02B | H02B | C02C | C02D | C02E | H02E | C02F | C02G |
| C02H | H02H | C02I | H02I | C02J | H02J | F02K | C02L |
| H02L | C02M | H02M | C02N | C02O | H02O | C02P | C02Q |
| H02Q | C02R | H02R | F02S | C02T | H02T | C02U | F02V |
| C02W | H02W | C02X | H02X | C02Y | C02Z | C030 | H030 |
| C031 | C032 | H032 | C033 | H033 | C034 | H034 | F035 |

|      |      |      |      |      |      |      |      |
|------|------|------|------|------|------|------|------|
| F036 | F037 | C038 | H038 | C039 | C03A | H03A | F03B |
| C03C | C03D | C03E | H03E | F03F | C03G | H03G | C03H |
| C03I | H03I | C03J | H03J | C03K | H03K | C03L | H03L |
| C03M | H03M | C03N | H03N | C03O | H03O | C03P | H03P |
| C03Q | H03Q | C03R | F03S | C03T | H03T | F03U | F03V |
| C03W | H03W | C03X | C03Y | H03Y | C03Z | H03Z | C040 |
| H040 | C042 | H042 | C043 | H043 | F044 | C045 | H045 |
| C046 | H046 | C047 | H047 | C048 | C049 | C04A | H04A |
| C04B | C04C | C04D | H04D | C04E | C04F | H04F | C04G |
| H04G | C04H | F04I | C04J | H04J | C04K | H04K | F04L |
| C04M | H04M | F04N | C04O | C04P | H04P | F04Q | C04R |
| H04R | F04S | C04T | H04T | C04U |      |      |      |

PLAT794\_ALERT\_5\_G Tentative Bond Valency for Tb01 (III) . 3.37 Info  
 PLAT794\_ALERT\_5\_G Tentative Bond Valency for Tb02 (III) . 3.42 Info  
 PLAT860\_ALERT\_3\_G Number of Least-Squares Restraints ..... 78 Note  
 PLAT868\_ALERT\_4\_G ALERTS Due to the Use of \_smtbx\_masks Suppressed ! Info  
 PLAT910\_ALERT\_3\_G Missing # of FCF Reflection(s) Below Theta(Min). 4 Note  
                   0 2 0, 1 1 0, 2 0 0, 1 1 1,  
 PLAT912\_ALERT\_4\_G Missing # of FCF Reflections Above STh/L= 0.600 6819 Note  
 PLAT933\_ALERT\_2\_G Number of HKL-OMIT Records in Embedded .res File 6 Note  
                   2 4 2, 7 2 1, 4 0 2, 0 2 2, 3 1 2, 4 1 1,  
 PLAT941\_ALERT\_3\_G Average HKL Measurement Multiplicity ..... 4.2 Low  
 PLAT951\_ALERT\_5\_G Calculated (ThMax) and CIF-Reported Kmax Differ 7 Units  
 PLAT957\_ALERT\_1\_G Calculated (ThMax) and Actual (FCF) Kmax Differ 7 Units  
 PLAT969\_ALERT\_5\_G The 'Henn et al.' R-Factor-gap value ..... 2.84 Note  
                   Predicted wR2: Based on SigI\*\*2 5.31 or SHELX Weight 15.12  
 PLAT978\_ALERT\_2\_G Number C-C Bonds with Positive Residual Density. 0 Info

---

0 **ALERT level A** = Most likely a serious problem - resolve or explain  
 7 **ALERT level B** = A potentially serious problem, consider carefully  
 37 **ALERT level C** = Check. Ensure it is not caused by an omission or oversight  
 42 **ALERT level G** = General information/check it is not something unexpected

3 ALERT type 1 CIF construction/syntax error, inconsistent or missing data  
 55 ALERT type 2 Indicator that the structure model may be wrong or deficient  
 14 ALERT type 3 Indicator that the structure quality may be low  
 10 ALERT type 4 Improvement, methodology, query or suggestion  
 4 ALERT type 5 Informative message, check

---

It is advisable to attempt to resolve as many as possible of the alerts in all categories. Often the minor alerts point to easily fixed oversights, errors and omissions in your CIF or refinement strategy, so attention to these fine details can be worthwhile. In order to resolve some of the more serious problems it may be necessary to carry out additional measurements or structure refinements. However, the purpose of your study may justify the reported deviations and the more serious of these should normally be commented upon in the discussion or experimental section of a paper or in the "special\_details" fields of the CIF. checkCIF was carefully designed to identify outliers and unusual parameters, but every test has its limitations and alerts that are not important in a particular case may appear. Conversely, the absence of alerts does not guarantee there are no aspects of the results needing attention. It is up to the individual to critically assess their own results and, if necessary, seek expert advice.

### **Publication of your CIF in IUCr journals**

A basic structural check has been run on your CIF. These basic checks will be run on all CIFs submitted for publication in IUCr journals (*Acta Crystallographica*, *Journal of Applied Crystallography*, *Journal of Synchrotron Radiation*); however, if you intend to submit to *Acta Crystallographica Section C* or *E* or *IUCrData*, you should make sure that full publication checks are run on the final version of your CIF prior to submission.

### **Publication of your CIF in other journals**

Please refer to the *Notes for Authors* of the relevant journal for any special instructions relating to CIF submission.

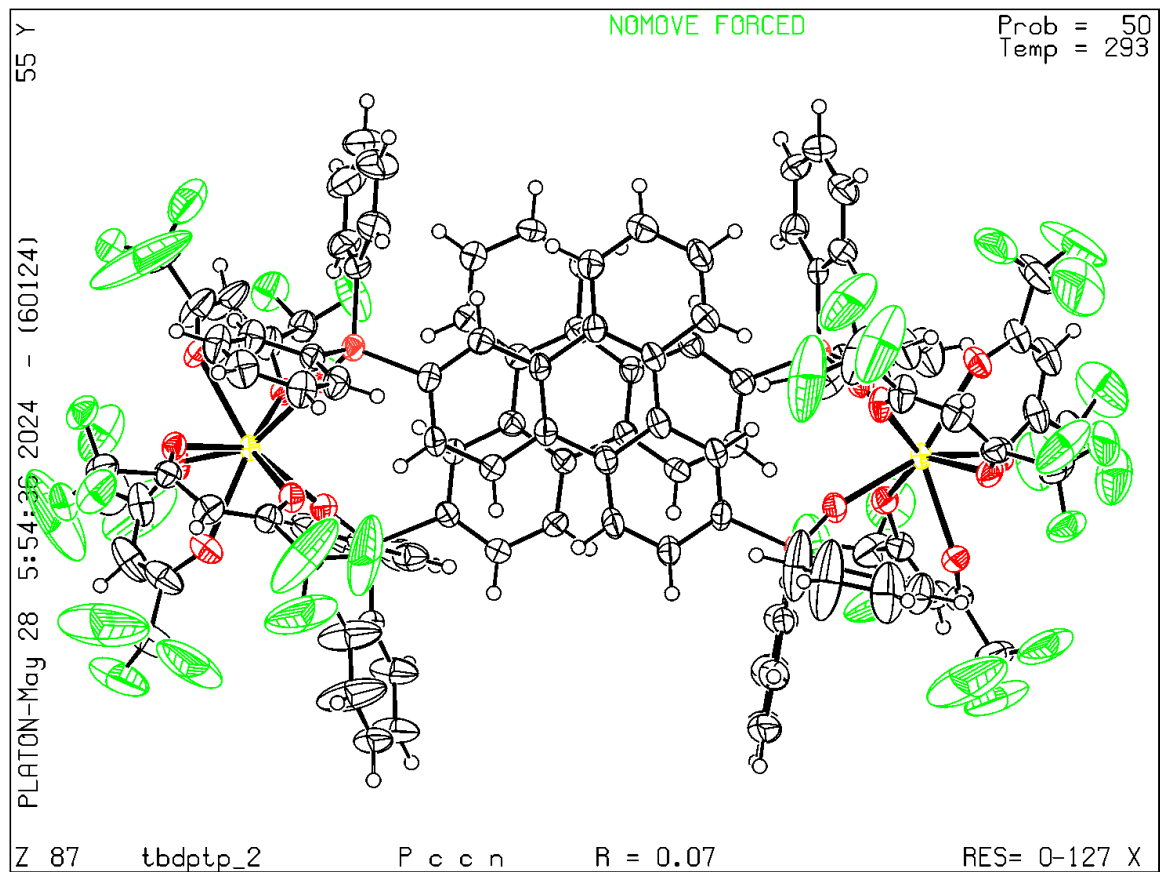

Supplement: Supplementary file 2 [file b5a46abdc91790fc5ef60a87.pdf]
